# Supplementary material
Source: PubMed Central journal article supplement (PMC3685688)
Supplement: Supp_Table1.pdf [file Supp_Table1.pdf]

## Supplementary Data

SUPPLEMENTARY TABLE S1. PRIMERS EMPLOYED IN AMPLIFICATION AND SEQUENCING (*env* AND *tax*) OF PROVIRAL DNA OF HUMAN T LYMPHOTROPIC VIRUS TYPE 2 IN PATIENTS COINFECTED WITH HIV-1 FROM SOUTHERN AND SOUTHEASTERN BRAZIL

| <i>Molecular assay</i>             | <i>Primer</i>  | <i>Sequence 5'–3' and product size</i>     | <i>Position<sup>a</sup></i> |
|------------------------------------|----------------|--------------------------------------------|-----------------------------|
| PCR <i>env</i> <sup>b</sup>        | E5 Forward     | AGC CAA GTG TCC CTT CGA CTA (21 bp)        | 5603–5623                   |
|                                    | E2 Reverse     | CTG CAG AAG CTA GCA GGT CTA (21 bp)        | 6641–6661                   |
| n-PCR <i>env</i> <sup>b,c</sup>    | E3 Forward     | TTC TCT AAG TGC GGC TCC TC (20 bp)         | 5627–5646                   |
|                                    | E2 Reverse     | CTG CAG AAG CTA GCA GGT CTA (21 bp)        | 6641–6661                   |
| Sequencing <i>env</i> <sup>b</sup> | GP21F1 Forward | CTG CAA CAA CTC CAT TAT CCT (21 bp)        | 6031–6051                   |
| PCR <i>tax</i> <sup>d</sup>        | Px101 Forward  | GGC AAT CTC CTA AAA TAG TCT (21 bp)        | 7155–7175                   |
|                                    | Px106 Reverse  | GGG CCG TGG TTT CAG TTC CTA (21 bp)        | 8306–8326                   |
| n-PCR <i>tax</i> <sup>c,d</sup>    | Px103 Forward  | TTA CAA TCC TGT CTC CTC TCA (21 bp)        | 7192–7212                   |
|                                    | Px106 Reverse  | GGG CCG TGG TTT CAG TTC CTA (21 bp)        | 8306–8326                   |
| Sequencing <i>tax</i> <sup>d</sup> | Px105 Forward  | GCT <b>ATC</b> CCC ACC CAT GAC ATG (21 bp) | 7683–7703                   |
|                                    | LS1 Forward    | GAA TAC ACC AAC ATC CCT GTC (21 bp)        | 8140–8160                   |
|                                    | Px102 Reverse  | TGT GTG TAG GAA CAT TTT GTA (21 bp)        | 7795–7815                   |

<sup>a</sup>Primer nucleotide position is provided as aligned with Mo (HTLV-2-infected cell line; GenBank AN M10060).

<sup>b</sup>Adapted from Egan *et al.* (1999)<sup>23</sup> and Shindo *et al.* (2002).<sup>24</sup>

<sup>c</sup>Primers employed in n-PCR and sequencing.

<sup>d</sup>Adapted from Eiraku *et al.* (1996).<sup>13</sup>

**A**, Highlighted degenerate nucleotide.

bp, base pairs; PCR, polymerase chain reaction; n-, nested.
