# Supplementary material
Source: PubMed Central journal article supplement (PMC3685688)
Supplement: Supp_Table2.pdf [file Supp_Table2.pdf]

SUPPLEMENTARY TABLE S2. POLYMERASE CHAIN REACTION ASSAYS (*env* AND *tax*) PROTOCOLS  
FOR DETECTING PROVIRAL DNA OF HUMAN T LYMPHOTROPIC VIRUS TYPE 2 IN PATIENTS  
COINFECTED WITH HIV-1 FROM SOUTHERN AND SOUTHEASTERN BRAZIL

| <i>Reaction conditions</i>        | <i>HTLV-2 env</i> <sup>a</sup> |                                                                                           | <i>HTLV-2 tax</i> <sup>b</sup> |                                                                                     |
|-----------------------------------|--------------------------------|-------------------------------------------------------------------------------------------|--------------------------------|-------------------------------------------------------------------------------------|
|                                   | <i>PCR</i>                     | <i>n-PCR</i>                                                                              | <i>PCR</i>                     | <i>n-PCR</i>                                                                        |
| <b>Reagents</b>                   |                                |                                                                                           |                                |                                                                                     |
| GoTaq Colorless Master Mix 2X     | 12.5 $\mu$ l                   | 25 $\mu$ l                                                                                | 12.5 $\mu$ l                   | 25 $\mu$ l                                                                          |
| Primer Forward 10 pmol/ $\mu$ L   | 1 $\mu$ l                      | 1.5 $\mu$ l                                                                               | 1 $\mu$ l                      | 1.5 $\mu$ l                                                                         |
| Primer Reverse 10 pmol/ $\mu$ L   | 1 $\mu$ l                      | 1.5 $\mu$ l                                                                               | 1 $\mu$ l                      | 1.5 $\mu$ l                                                                         |
| H <sub>2</sub> O                  | 8 $\mu$ l                      | 17 $\mu$ l                                                                                | 8 $\mu$ l                      | 17 $\mu$ l                                                                          |
| DNA <i>input</i>                  | 2.5 $\mu$ l                    | 5 $\mu$ l                                                                                 | 2.5 $\mu$ l                    | 5 $\mu$ l                                                                           |
| Final volume                      | 25 $\mu$ L                     | 50 $\mu$ l                                                                                | 25 $\mu$ l                     | 50 $\mu$ l                                                                          |
| <b>Thermal cycling conditions</b> |                                |                                                                                           |                                |                                                                                     |
|                                   | 30 cycles                      | 94°C–4 min<br>94°C–1 min<br>56°C–1 min<br>72°C–1 min 30 s<br>72°C–10 min<br>8°C– $\infty$ | 35 cycles                      | 95°C–5 min<br>95°C–40 s<br>52,5°C–30 s<br>72°C–40 s<br>72°C–10 min<br>8°C– $\infty$ |

<sup>a</sup>Adapted from Egan *et al.* (1999)<sup>23</sup> and Shindo *et al.* (2002).<sup>24</sup>

<sup>b</sup>Adapted from Eiraku *et al.* (1996).<sup>13</sup>
